# Supplementary material for: The Behavioral Problems in 2.5–5 Years Old Children Linked with Former Neonatal/Infantile Surgical Parameters
Source: MDPI journal article supplement (doi:10.3390/children8050423), 2021-05-20
Supplement: s1 [file s1]

**Table S1.** Socio-demographic and clinical characteristics of the lost to follow-up patients ( $n = 10$ ). Values are mean; median (range) or number of patients (%).

|                                                                         |                                         |
|-------------------------------------------------------------------------|-----------------------------------------|
| Gestational age (weeks)                                                 | 38.4; 39.5 (33-40)                      |
| Preterm:                                                                | 2 (20%)                                 |
| Gestation 30-33 weeks                                                   | 1                                       |
| Gestation 34-36                                                         | 1                                       |
| Gestation 37 weeks                                                      | 0                                       |
| Age at the day of surgery (days)                                        | 34.4; 33 (2-90) <sup>1</sup>            |
| Preterm at the day of surgery                                           | 0                                       |
| Weight at the day of surgery (g)                                        | 4158.7; 3882.5 (3000-6300) <sup>1</sup> |
| Surgery:                                                                |                                         |
| Gastrointestinal (including anorectal)                                  | 4 (40 %)                                |
| Abdominal wall defects                                                  | 2 (20 %)                                |
| Urogenital                                                              | 2 (20 %)                                |
| Teratoma                                                                | 2 (20 %)                                |
| Thoracic                                                                | -                                       |
| Biliary                                                                 | -                                       |
| ASA class:                                                              |                                         |
| 1                                                                       | 2 (20 %) <sup>1</sup>                   |
| 2                                                                       | 6 (60 %)                                |
| 3                                                                       | 2 (20 %)                                |
| 4                                                                       | -                                       |
| Duration of anesthesia (min)                                            | 93; 70 (35-260)                         |
| Mean intraoperative cerebral rSO <sub>2</sub> value (%)                 | 81.1; 82.1 (70.5-89)                    |
| Maximal intraoperative rSO <sub>2</sub> change                          | 15.3; 14.5 (7-31)                       |
| Perioperative ventilation hours                                         | 14.2; 2.5 (1-61)                        |
| Cumulative perioperative dose of opioids (µg kg <sup>-1</sup> )         | 29.48; 3.65 (1.1-222.6)                 |
| Cumulative perioperative dose of benzodiazepines (µg kg <sup>-1</sup> ) | 340; 0 (0-1600)                         |
| Length of stay in the intensive care unit (days)                        | 3.7; 2 (0-20)                           |

$p < 0.05$ , compared to the studied group (by Mann-Whitney and Chi-squared tests, where appropriate).

**Table S2.** Multiple linear regression model showing the association of perioperative mechanical lung ventilation (DMV) hours with externalizing problem score adjusted for 2 confounding variables (adjusted  $R^2 = 0.242$ ;  $p = 0.010$ )

| Variable                                                      | Regression beta coefficient (β) | 95% confidence interval |
|---------------------------------------------------------------|---------------------------------|-------------------------|
| DMV <sup>1</sup>                                              | 0.080                           | 0.011; 0.148            |
| Patient's age at the day of psychological assessment (months) | -0.08                           | -0.31; 0.16             |
| gestational age (weeks)                                       | -0.14                           | -0.95; 0.66             |

<sup>1</sup>  $p = 0.025$

**Table S3.** Multiple linear regression model showing the association of perioperative mechanical lung ventilation (DMV) hours with externalizing problem score adjusted for 3 confounding variables (adjusted  $R^2 = 0.241$ ;  $p = 0.016$ )

| Variable                                                      | Regression beta coefficient (β) | 95% confidence interval |
|---------------------------------------------------------------|---------------------------------|-------------------------|
| DMV <sup>1</sup>                                              | 0.066                           | -0.009; 0.140           |
| Patient's age at the day of psychological assessment (months) | -0.07                           | -0.31; 0.16             |
| gestational age (weeks)                                       | -0.34                           | -1.24; 0.57             |
| age at the day of surgery (days)                              | -0.05                           | -0.15; 0.05             |

<sup>1</sup>  $p = 0.083$

**Table S4.** Multiple linear regression model showing the association of perioperative opioid dose per days of ventilation (ODDV) with externalizing problem score adjusted for 2 confounding variables (adjusted  $R^2 = 0.335$ ;  $p = 0.002$ )

| Variable                                                      | Regression beta coefficient ( $\beta$ ) | 95% confidence interval |
|---------------------------------------------------------------|-----------------------------------------|-------------------------|
| ODDV <sup>1</sup>                                             | 0.009                                   | 0.003; 0.014            |
| Patient's age at the day of psychological assessment (months) | -0.12                                   | -0.31; 0.07             |
| gestational age (weeks)                                       | -0.04                                   | -0.80; 0.73             |

<sup>1</sup>  $p = 0.003$

**Table S5.** Multiple linear regression model showing the association of perioperative opioid dose per days of ventilation (ODDV) with externalizing problem score adjusted for 3 confounding variables (adjusted  $R^2 = 0.344$ ;  $p = 0.002$ )

| Variable                                                      | Regression beta coefficient ( $\beta$ ) | 95% confidence interval |
|---------------------------------------------------------------|-----------------------------------------|-------------------------|
| ODDV <sup>1</sup>                                             | 0.008                                   | 0.002; 0.013            |
| Patient's age at the day of psychological assessment (months) | -0.096                                  | -0.29; 0.099            |
| gestational age (weeks)                                       | -0.24                                   | -1.07; 0.60             |
| age at the day of surgery (days)                              | -0.05                                   | -0.14; 0.04             |

<sup>1</sup>  $p = 0.007$

**Table S6.** Multiple linear regression model showing the association of perioperative opioid dose per days of ventilation (ODDV) with externalizing problem score adjusted for 4 confounding variables (adjusted  $R^2 = 0.321$ ;  $p = 0.006$ )

| Variable                                                        | Regression beta coefficient ( $\beta$ ) | 95% confidence interval |
|-----------------------------------------------------------------|-----------------------------------------|-------------------------|
| ODDV <sup>1</sup>                                               | 0.008                                   | 0.002; 0.014            |
| Patient's age at the day of psychological assessment (months)   | -0.098                                  | -0.30; 0.10             |
| gestational age (weeks)                                         | -0.23                                   | -1.08; 0.62             |
| age at the day of surgery (days)                                | -0.05                                   | -0.15; 0.04             |
| perioperative dose of benzodiazepines ( $\mu\text{g kg}^{-1}$ ) | -0.0002                                 | -0.005; 0.004           |

<sup>1</sup>  $p = 0.011$
